# Supplementary material
Source: PubMed Central journal article supplement (PMC2863165)
Supplement: supp_M109.052845_jbc.M109.052845-1.pdf [file supp_M109.052845_jbc.M109.052845-1.pdf]

## Supplemental data

**A.**

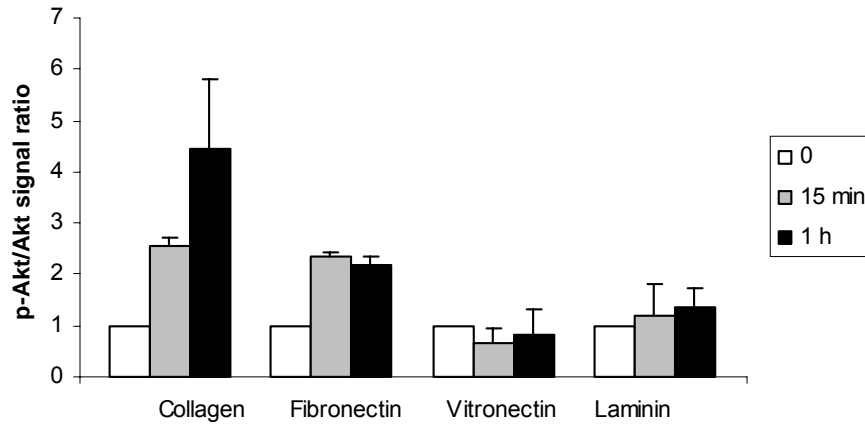

**B.**

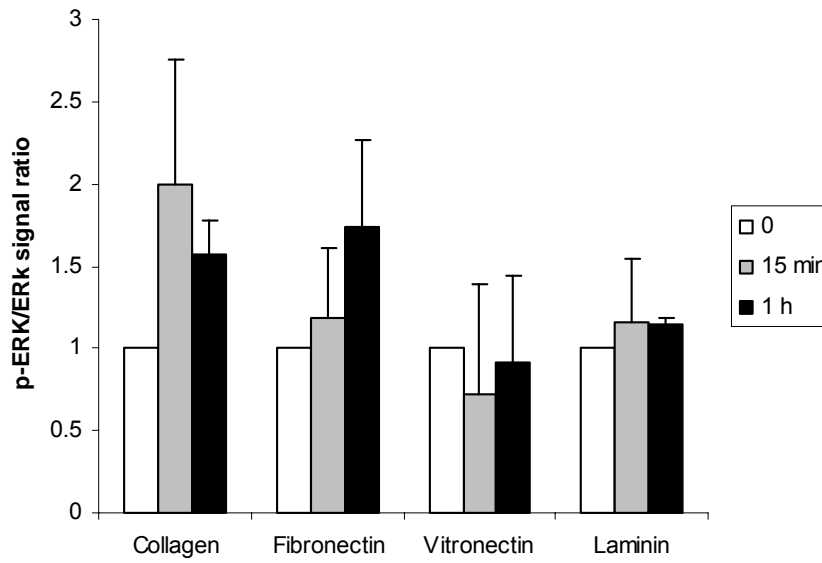

**C.**

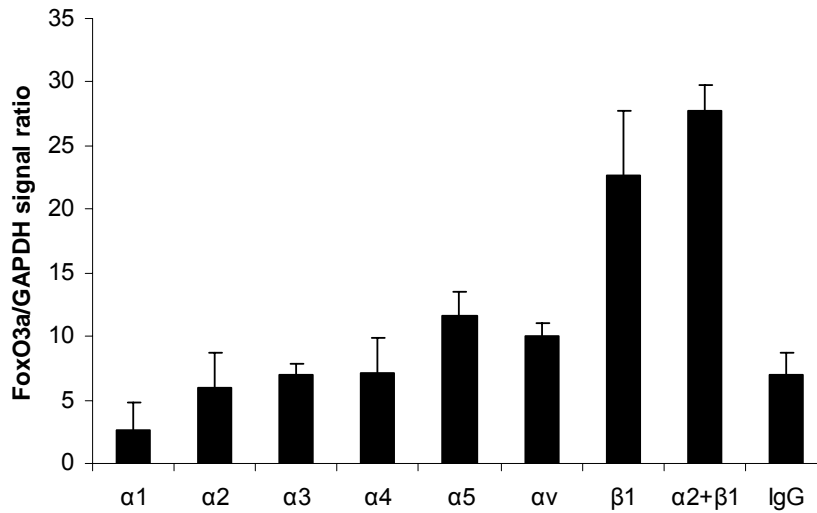

**D.**

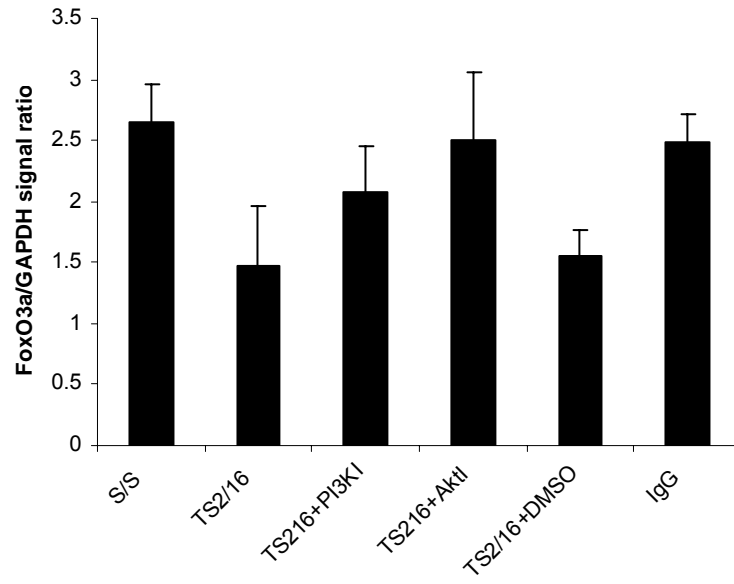

**E.**

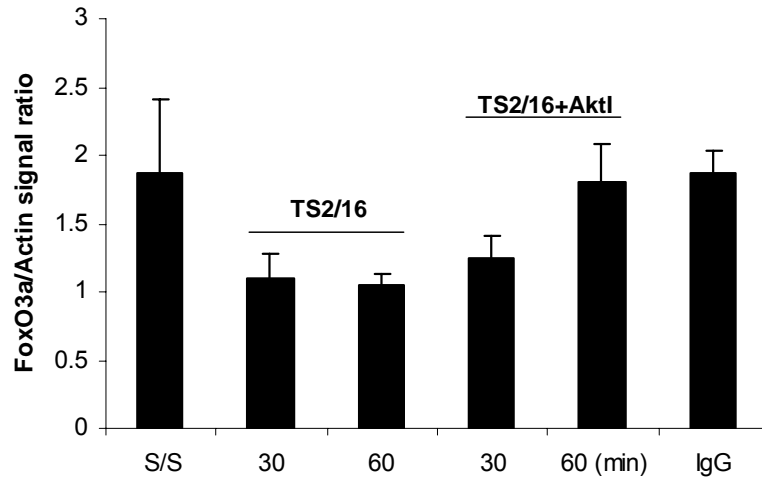

**F.**

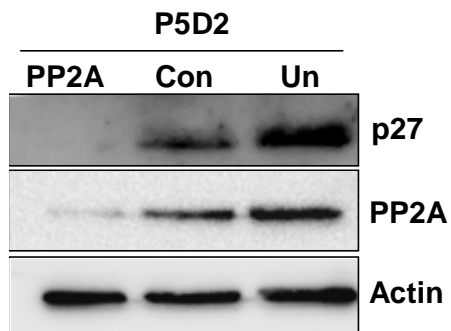

## Figure legends

In Figures A and B, lung fibroblasts were serum starved followed by attachment to type I collagen, fibronectin, vitronectin or laminin coated plates as a function of time. Western analysis was performed and signal intensity of chemiluminescent bands were measured by densitometry and plotted. Each experiment was repeated 3 times and data are mean  $\pm$  S.D. A) Serine 473 phosphorylated Akt vs total Akt signal ratio is shown. B) Phosphorylated Erk (p-44/p-42) vs total Erk signal ratio is shown. C) Human lung fibroblasts were pre-incubated with  $\alpha$  integrin subunit blocking antibodies or  $\beta$ 1 integrin blocking antibody (1  $\mu$ g/ml, respectively) or both for 45 min. Cells were then placed on collagen coated plates for 30 min and FoxO3a and GAPDH signal intensity were measured and plotted. D) Serum starved human lung fibroblasts were pre-incubated with PI3K inhibitor (PI3KI) or Akt inhibitor (AktI) for 45 min. Cells were then stimulated with 3  $\mu$ g/ml of  $\beta$ 1 integrin activating antibody (TS2/16) for 60 min. FoxO3a vs GAPDH signal ratio was measured and plotted. E) Human lung fibroblasts were pre-incubated with Akt inhibitor for 45 min. Cells were then ligated with 3  $\mu$ g of  $\beta$ 1 integrin activating antibody (TS2/16) or IgG isotype control as a function of time. FoxO3a vs actin signal ratio was measured and plotted. F) Human lung fibroblasts were transfected with 10 nM of PP2A siRNA (PP2A) or control siRNA (Con) along with untransfected (Un) cells followed by serum starvation for a day. Cells were then pre-incubated with  $\beta$ 1 integrin blocking antibody (P5D2, 1  $\mu$ g/ml) for 45 min and attached to collagen coated plates for 30 min. p27, PP2A and actin expression were then measured.
